# Supplementary material for: Development of a pan-genotypic monoclonal antibody-based competitive ELISA for the detection of antibodies against Bovine viral diarrhea virus
Source: PubMed Central journal article supplement (PMC11625775; doi:10.3389/fimmu.2024.1504115), 2024-11-25

**Blocking Buffer**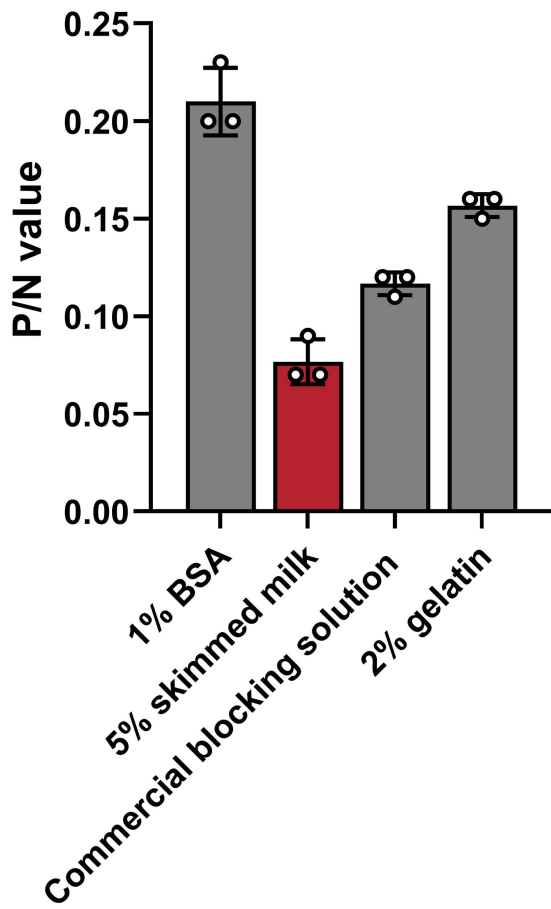**Incubation Time of Antibodies**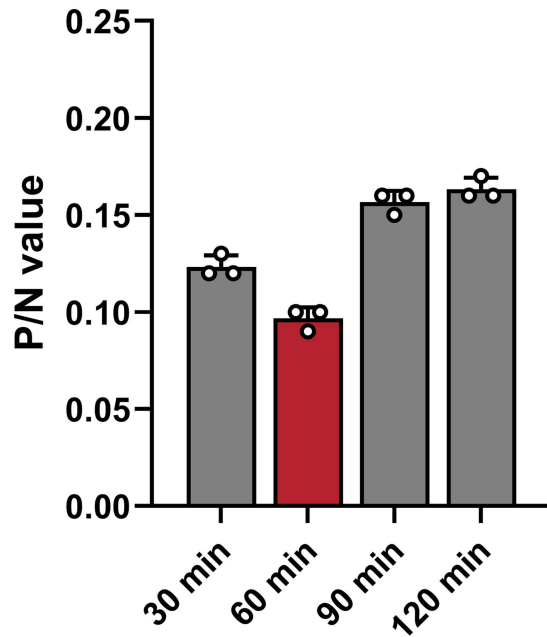**Colorimetric Reaction Time**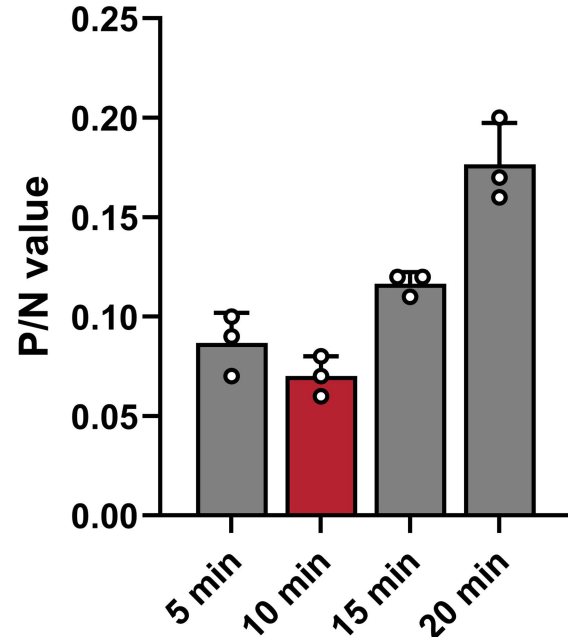

Supplement: DataSheet1.pdf [file DataSheet1.pdf]
